# Supplementary material for: Strategic data center siting can mitigate dilemmas between decarbonization and digitalization in Japan
Source: Research Square preprint supplement (doi:10.21203/rs.3.rs-6707312/v1), 2025-05-21
Supplement: Supplementary file 1 [file a395ca373f2f59a53acd7b4e.pdf]

Supplementary Information for

## Strategic data center siting can mitigate dilemmas between decarbonization and digitalization in Japan

Hiroaki Onodera<sup>1</sup>, Hiroto Shiraki<sup>2</sup>, and Keisuke Matsuhashi<sup>1</sup>

<sup>1</sup> Social Systems Division, National Institute for Environmental Studies, 16-2 Onogawa Tsukuba, Ibaraki, 305-8506, Japan

<sup>2</sup> Graduate School of Environmental Studies, Nagoya University, Furo-cho, Chikusa, Nagoya, Aichi, 464-8601, Japan

## Supplementary Figures

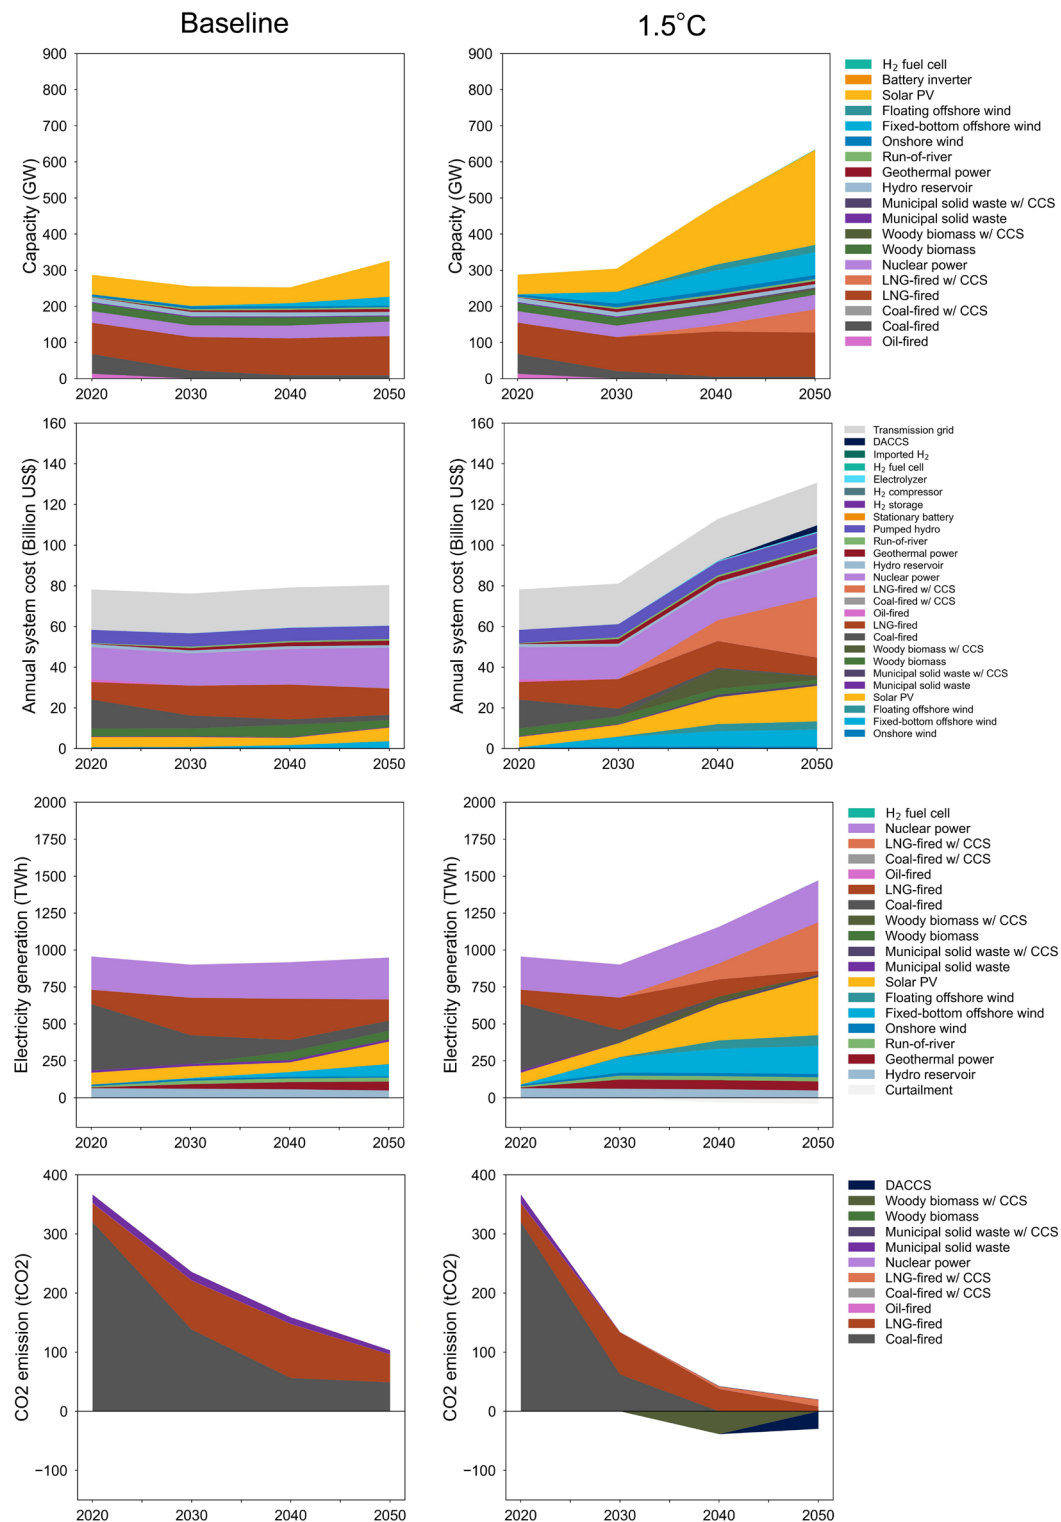

Supplementary Figure 1: Calculated trajectories of Japan's electricity sector under the baseline-Mid and 1.5°C-Mid scenarios. From top to bottom: installed capacity, annual system cost, electricity generation, and CO<sub>2</sub> emissions, each disaggregated by technology.



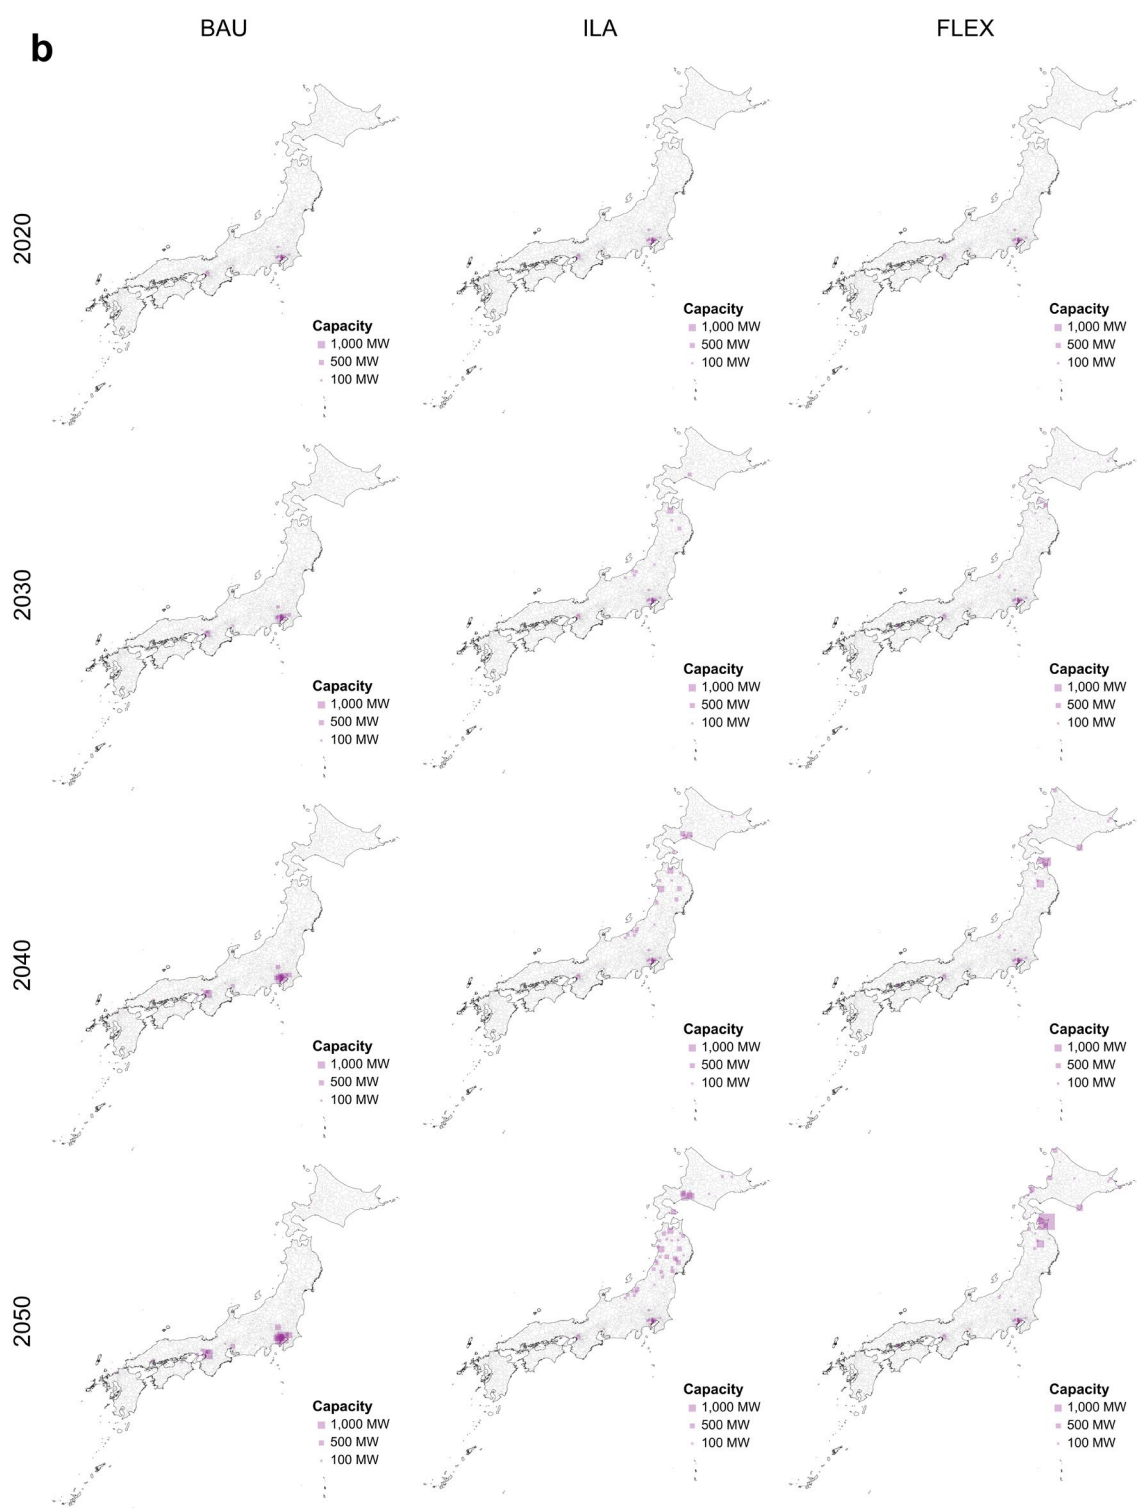

Supplementary Figure 2: Data center location scenarios under different siting strategies. **a** and **b** show baseline-Mid and 1.5°C-Mid scenarios, respectively.



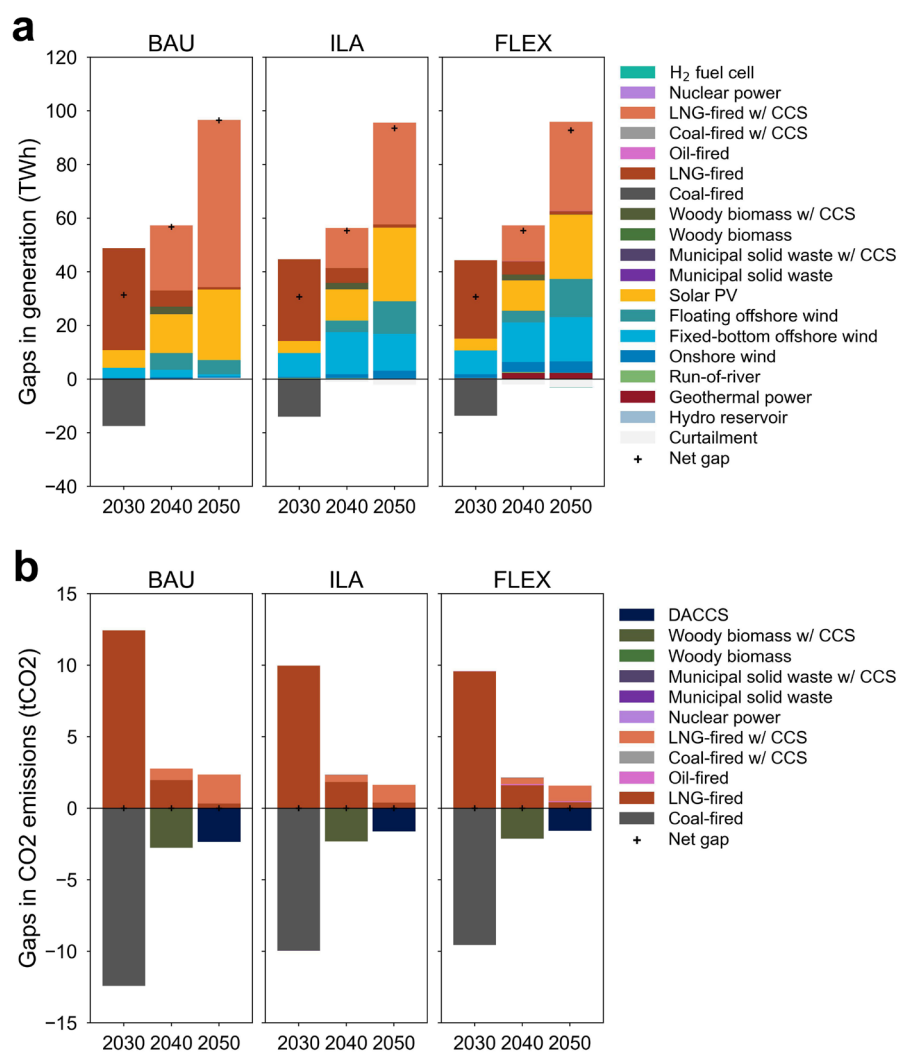

Supplementary Figure 3: Impacts of data center growth on annual electricity generation and CO<sub>2</sub> emissions, shown in **a** and **b**, respectively, by siting strategies under the 1.5°C-Mid scenario.

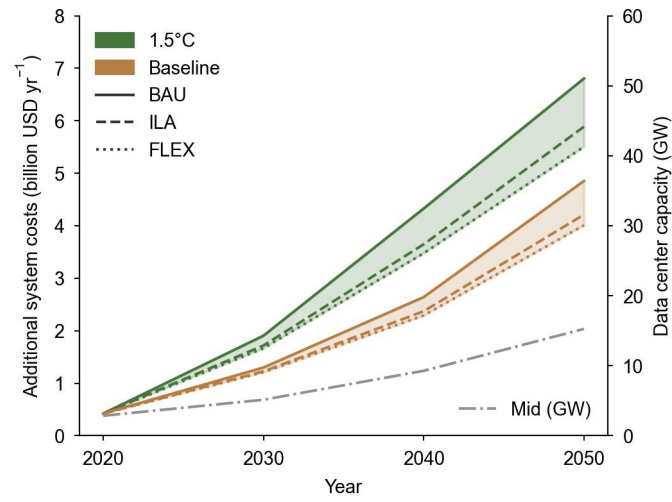

Supplementary Figure 4: Additional system costs due to data center growth. Green and orange lines show 1.5°C-Mid and baseline-Mid scenarios, respectively. Colored solid, dashed, and dotted lines indicate data center siting strategies of BAU, ILA, and FLEX, respectively. A grey dash-dotted line indicates the data center capacity assumption.

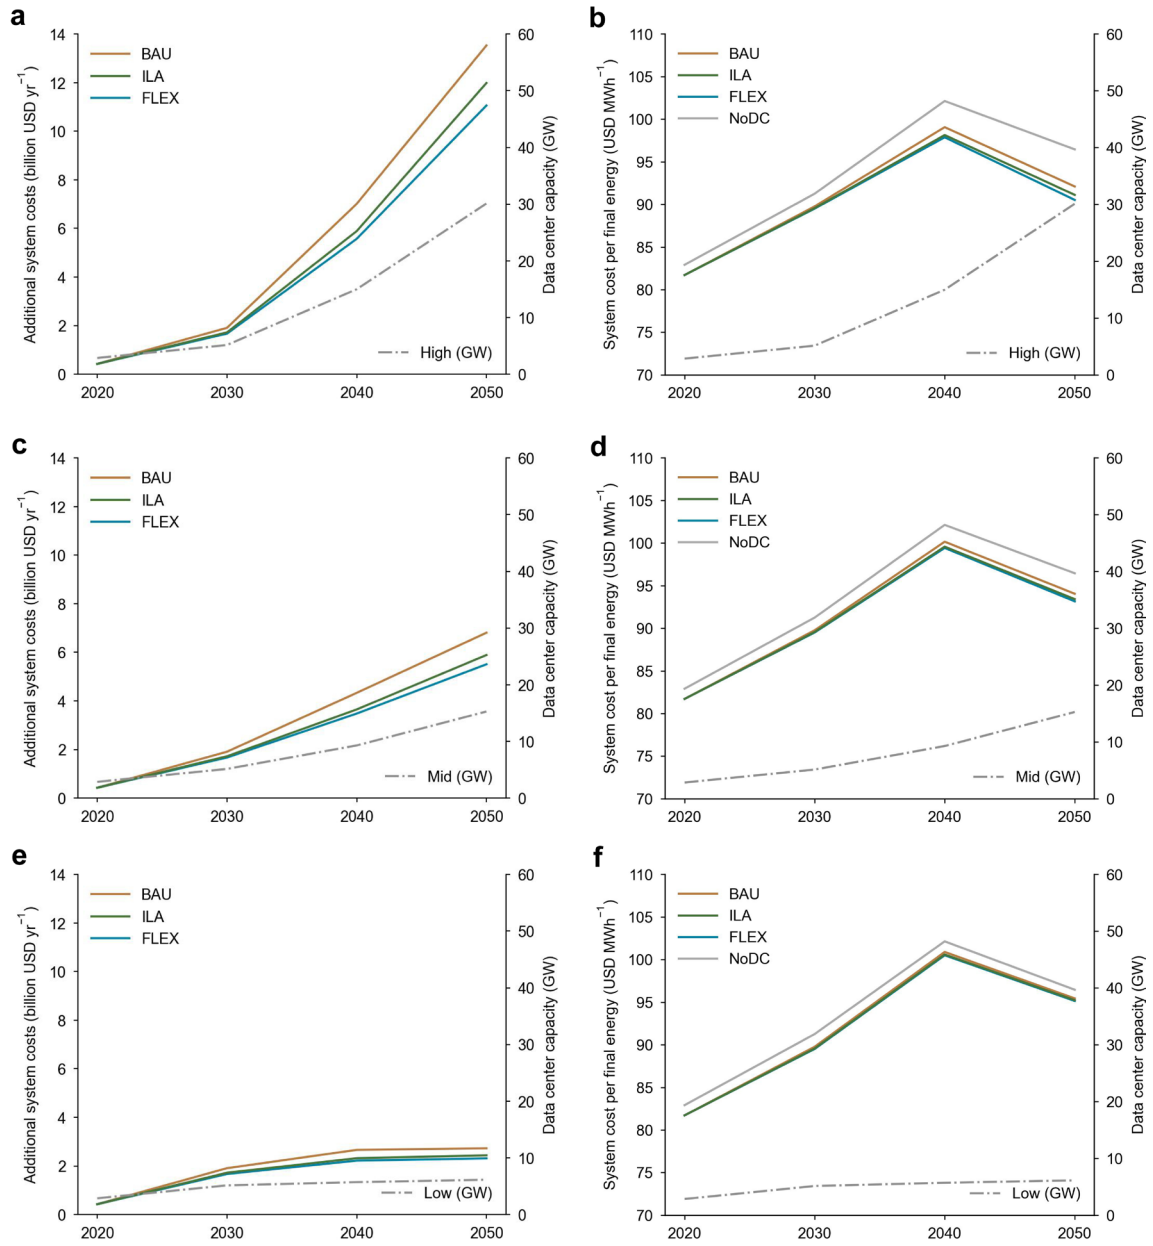

Supplementary Figure 5: **a**, **c**, and **e** present the additional system cost due to data center expansion under the 1.5°C pathway. **b**, **d**, and **f** present the system cost per final energy, assuming high, medium, and low data center electricity demand projections, respectively. The grey solid line corresponds to the NoDC scenario and the grey dash-dotted lines show the total data center capacity (right axis).

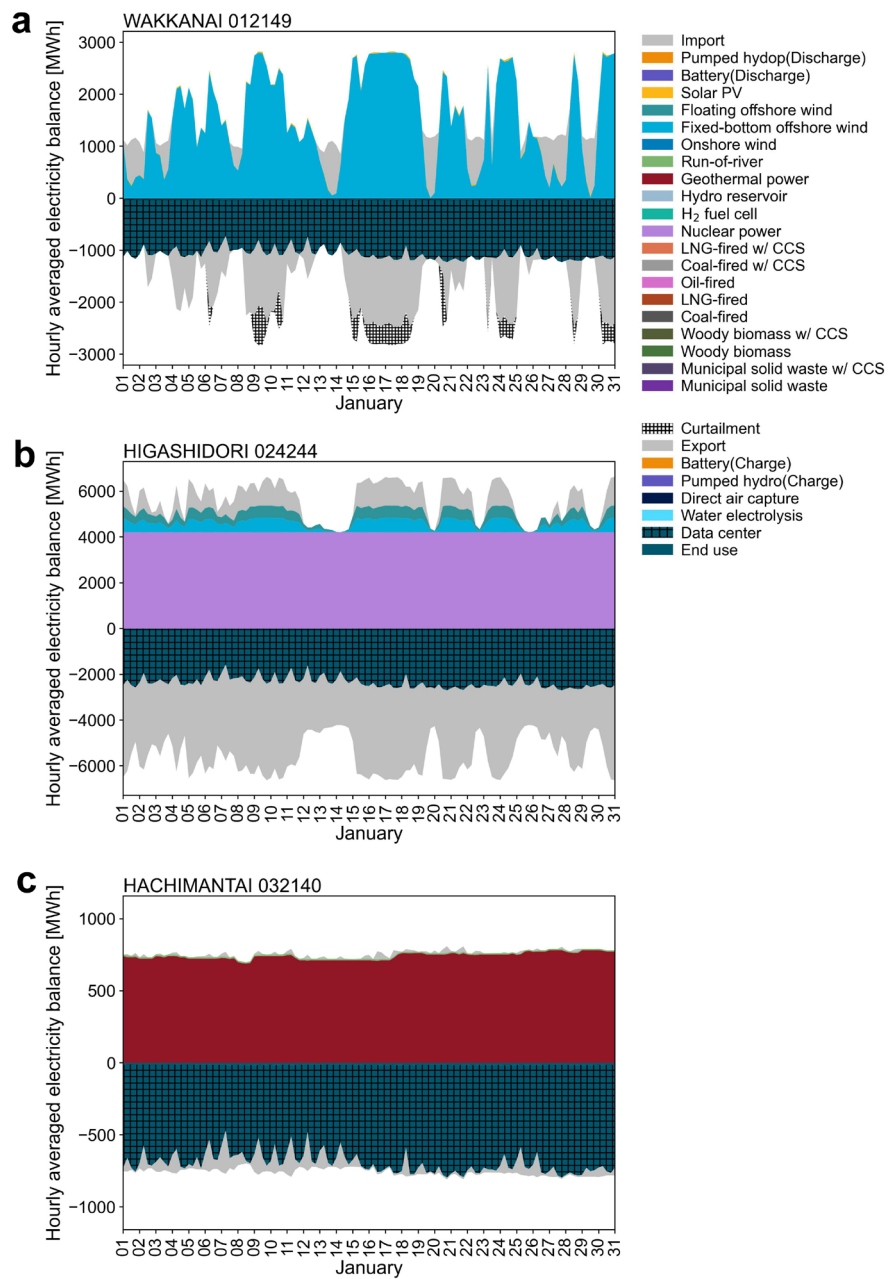

Supplementary Figure 6: Hourly averaged electricity balance in January 2050 under the 1.5°C-Mid scenario with the FLEX strategy. **a**, **b**, and **c** represent Wakkanaï City, Higashidori Village, and Hachimantai City, respectively.

## Supplementary Notes.

### 1 Model description

In this study, we employ a substantially enhanced version of the ReGRID model<sup>1</sup>, designed to strengthen both continuity with the existing electricity grid and consistency across regions. In previous studies, this model was used to design snapshots of fully renewable energy systems in a greenfield context, based on a hierarchical optimization approach. The updated version enables recursive optimization of transition pathways in a brownfield setting without relying on the hierarchical approach.

#### 1.1 System configuration

##### Technological resolution

The ReGRID model is a linear programming model that simultaneously optimizes region-specific capacity planning and hourly operational dispatch across technologies including electricity generation, energy conversion, storage, transmission, and carbon capture and sequestration (CCS). The technological configurations are detailed in Supplementary Figure 8. Final energy demand is treated as an exogenous input (see Supplementary Section 1.3), and technologies for end-use energy consumption are not explicitly modeled.

The model assumes that no new fossil fuel power plants will be constructed under increasing decarbonization pressure; their installed capacity is capped at existing levels. However, retrofitting existing plants with carbon capture facilities is allowed. Given the high uncertainty of nuclear power development to democratic and political decisions, nuclear capacity is treated as exogenously fixed. Following the Japanese government's latest policy direction (outlined in the 7th Strategic Energy Plan), this study assumes that currently suspended nuclear reactors (under regulatory review) will gradually resume operation. However, the replacement of reactors beyond their statutory lifetime (60 years) is considered highly uncertain and is therefore excluded from the analysis.

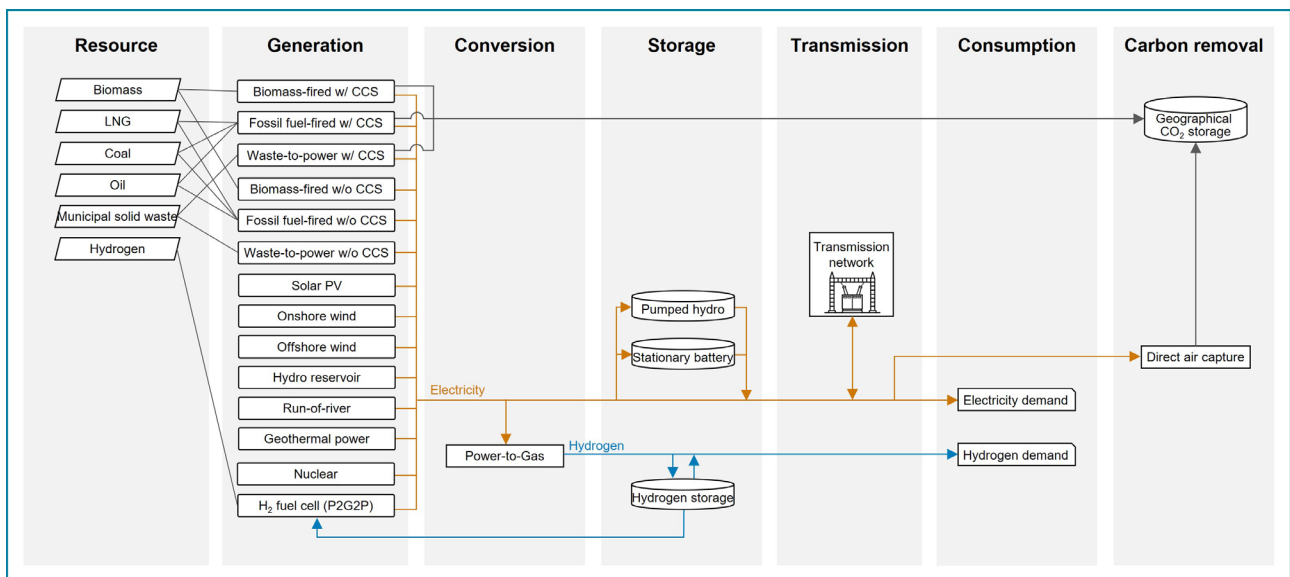

Supplementary Figure 7: Technological configurations and energy flows. Yellow, blue, and grey arrows represent electricity flows, hydrogen, and carbon flows, respectively.

### Spatial resolution

The model employs a spatial resolution of 1,741 nodes, corresponding to municipal administrative units in Japan. Among these, 403 nodes correspond to the locations of high-voltage substations and selected nodes representing remote islands. These are hereafter referred to as "substation nodes." These nodes can accommodate dispatchable and variable renewable energy (VRE) generation as well as grid-connected battery storage. The remaining 1,338 nodes, referred to as branch nodes, host VRE generation and balance electricity supply and demand through interregional transmission and curtailment.

Substation nodes are interconnected following the potential routes of existing and planned high-voltage transmission lines, categorized as HVAC, offshore HVDC, or onshore HVDC (Supplementary Figure 9). Branch nodes are linked to their nearest substation node via routes that minimize the total line distance; looped or redundant connections among branch nodes are not considered. The dataset on the existing transmission infrastructure is compiled from open sources such as OpenStreetMap<sup>2</sup> and publicly available information from OCCTO and Transmission System Operators (TSOs)<sup>3–13</sup>. We thank the developers of PyPSA meets Earth for providing the useful tool earth-osm (<https://github.com/pypsa-meets-earth/earth-osm>).

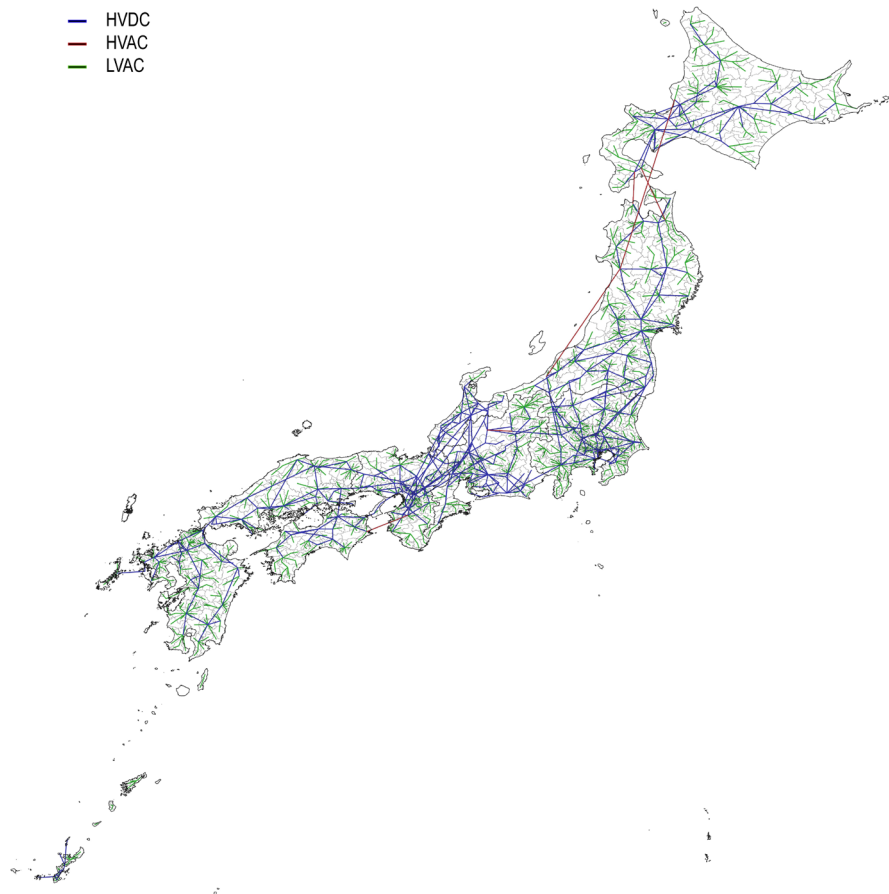

Supplementary Figure 8: Transmission network model. Blue and red lines indicate high-voltage AC (HVAC) and high-voltage DC (HVDC) transmission lines connecting substation nodes, respectively. Green lines show low-voltage AC lines, which connect substation and branch nodes, or between branch nodes.

## 1.2 Mathematical formulation

### Objective function

$$\min \left[ \sum_{r,g} c_g \cdot W_{r,g} + \sum_{r,r'} c_{r,r'} \cdot G_{r,r'} + \sum_{r,g,t} \dot{c}_g \cdot P_{r,g,t} + \sum_{r,f,t} \dot{c}_f \cdot I_{r,f,t} + \sum_{r,t} \dot{c}_c \cdot C_{r,t} + M \right] \quad (S1)$$

$$M = \sum_{r,r',t} \varepsilon \cdot (T_{r,r',t}^+ + T_{r,r',t}^-) + \sum_{r,s,t} \varepsilon \cdot (S_{r,s,t}^+ + S_{r,s,t}^-) \quad (S2)$$

where  $c_g$  are the fixed annualized costs for capacity  $W_{n,g}$  of technology  $g$  at each regional node  $r$ ;  $c_{r,r'}$  are the fixed annualized costs for transmission line capacity  $G_{r,r'}$  between nodes  $r$  and  $r'$ ;  $\dot{c}_g$  are the variable costs for generation  $P_{r,g,t}$  at each time step  $t$ ,  $\dot{c}_f$  are the variable costs for the import  $I_{r,f,t}$  of fuel  $f$  (hydrogen in this study); and  $\dot{c}_c$  are the variable costs for carbon sequestration  $C_{r,t}$ .  $M$  is a penalty term introduced to ensure numerical stability of the optimal solution, representing the sum of transmission (electricity import  $T_{r,r',t}^+$  and export  $T_{r,r',t}^-$  from  $r$  to  $r'$ ) and charge  $S_{r,s,t}^+$  and discharge  $S_{r,s,t}^-$  of storage  $s$ , each multiplied by minuscule weight  $\varepsilon$  ( $10^{-2}$  ¥/kWh).

### Electricity balance constraints

For substation nodes

$$\begin{aligned} \sum_{g \in VRE} h_{r,g,t} \cdot W_{r,g} + \sum_{g \in DG} P_{r,g,t} + \sum_{r'} T_{r,r',t}^+ + \sum_{g \in ST} S_{r,g,t}^- \\ = d_{r,t} + D_{r,t}^{DAC} + D_{r,t}^{P2G} + \sum_{r'} T_{r,r',t}^- + \sum_{g \in ST} S_{r,g,t}^+ + R_{r,t} + l'_{r,t} \cdot W_r^{DC} \quad \forall r \in SN \end{aligned} \quad (S3)$$

$l'_{r,t}$  represents the normalized power load profiles of a data center (i.e., the capacity factor), and  $W_r^{DC}$  denotes the capacity of data centers. The product of these two represents the electricity demand of data centers in node  $r$  at time  $t$ . The range of  $W_r^{DC}$  is constrained based on the location strategies, as represented by Equations (S4) to (S7). To calculate the integrated cost of demand, this term is omitted, and the dummy term from Equation (1) in the main text is added to the right-hand side of Equations (S3).

### Data center siting constraints

For the BAU strategy

Data centers are located according to existing distribution.

$$W_r^{DC} = a \cdot \frac{w_r}{\sum_{n \in R} w_n} \quad \forall r \in R \quad (S4)$$

For the DEV and ILA strategies

The total capacity of data centers is a given, and the existing capacity is the lower bound of capacity at each regional node.

$$\sum W_r^{DC} = g \quad (S5)$$

$$W_r^{DC} \geq w_r \quad \forall r \in R \quad (S6)$$

For the ILA strategy

The capacity of data centers at each regional node is capped based on integrated location assessment.



$$W_r^{DC} \leq w_r^{max} \quad \forall r \in R \quad (S7)$$

### Other constraints

All other constraints, regarding grid operation, resource limits, CO<sub>2</sub> emission caps, etc., are provided in the GitHub: <https://github.com/hiroakionodera/ReGRID/wiki>.

| Nomenclature              |                                                                                                 |                     |
|---------------------------|-------------------------------------------------------------------------------------------------|---------------------|
| Variable                  | Description                                                                                     | Unit or Range       |
| <b>Static variables</b>   |                                                                                                 |                     |
| $c_g$                     | Unit fixed cost for generation, conversion, and storage (\$/MWh for energy capacity of storage) | \$/MW or \$/MWh     |
| $c_{r,r'}$                | Unit fixed cost for transmission line                                                           | \$/MW               |
| $\hat{c}_g$               | Unit variable cost for generation                                                               | \$/MWh              |
| $\hat{c}_f$               | Unit variable cost for fuel import                                                              | \$/MWh              |
| $\hat{c}_c$               | Unit variable cost for carbon sequestration                                                     | \$/tCO <sub>2</sub> |
| $h$                       | Capacity factor of generation                                                                   | [0, 1]              |
| $\varepsilon$             | Minuscule cost                                                                                  | \$/MWh              |
| $l'$                      | Normalized electricity demand of a data center                                                  | [0, 1]              |
| $w$                       | Existing data center capacity                                                                   | MW                  |
| $w^{max}$                 | Data center siting potential                                                                    | MW                  |
| $a$                       | Total data center capacity                                                                      | MW                  |
| $d$                       | Final electricity demand                                                                        | MWh                 |
| <b>Decision variables</b> |                                                                                                 |                     |
| $P$                       | Electricity generation                                                                          | MWh                 |
| $R$                       | Curtailment                                                                                     | MWh                 |
| $S^+$                     | Charge to storage                                                                               | MWh                 |
| $S^-$                     | Discharge from storage                                                                          | MWh                 |
| $C$                       | Carbon sequestration                                                                            | tCO <sub>2</sub>    |
| $I$                       | Fuel import                                                                                     | MWh                 |
| $D^{DAC}$                 | Electricity demand of DAC                                                                       | MWh                 |
| $D^{P2G}$                 | Electricity demand of P2G                                                                       | MWh                 |
| $T^+$                     | Electricity import                                                                              | MWh                 |
| $T^-$                     | Electricity export                                                                              | MWh                 |
| $G$                       | Transmission line capacity                                                                      | MW                  |
| $W^{DC}$                  | Capacity of data center                                                                         | MW                  |
| $W$                       | Capacity of generation, conversion, and storage technologies                                    | MW or MWh           |
| <b>Subscript</b>          |                                                                                                 |                     |
| $r$                       | Node                                                                                            |                     |
| $r'$                      | Adjacent node                                                                                   |                     |
| $t$                       | Time                                                                                            |                     |
| $g$                       | Technology                                                                                      |                     |
| $f$                       | Fuel                                                                                            |                     |
| <b>Set</b>                |                                                                                                 |                     |
| $R$                       | All nodes                                                                                       |                     |
| $SN$                      | All substation nodes                                                                            |                     |
| $RN$                      | All branch nodes                                                                                |                     |
| $VRE$                     | Variable renewable energy technologies                                                          |                     |
| $DG$                      | Dispatchable generation technologies                                                            |                     |
| $ST$                      | Storage technologies                                                                            |                     |

### 1.3 Input data and assumptions

#### Socioeconomic and emissions pathways

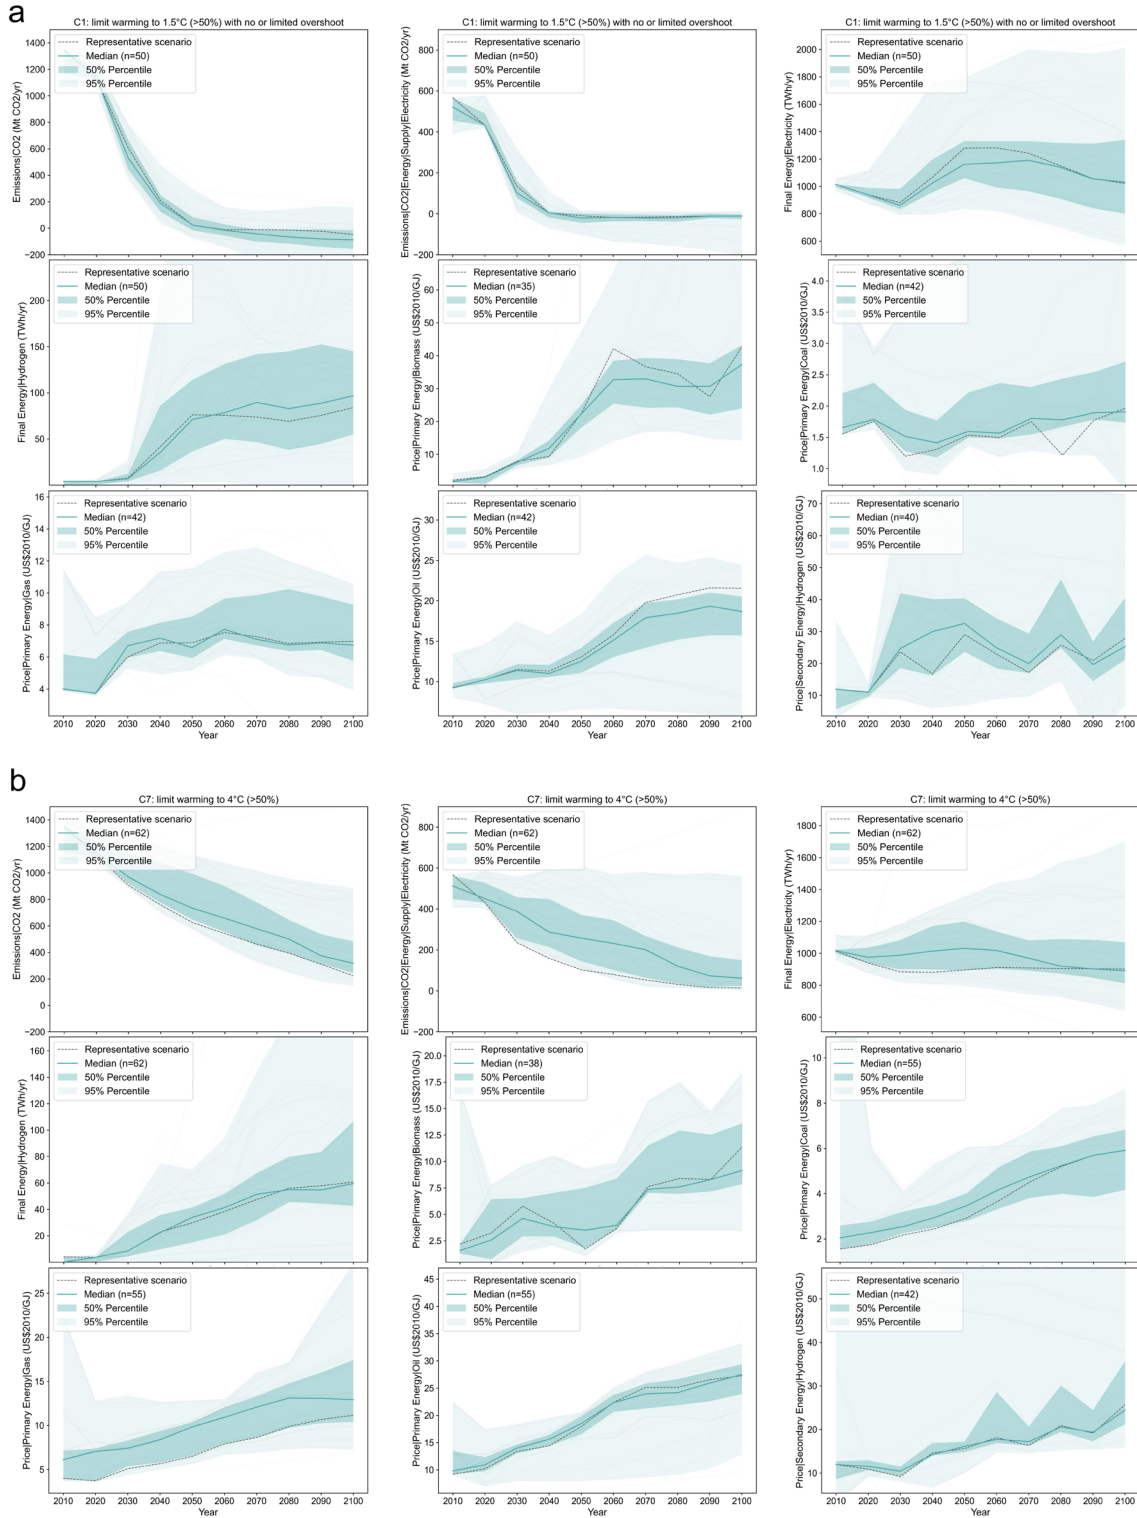

Supplementary Figure 9: Socioeconomic and emissions pathways from the AR6 scenarios database<sup>14</sup>.  $n$  denotes the number of scenarios. **a** shows scenarios classified as C1 (limit warming to 1.5°C (>50%) with no or limited overshoot). **b** presents scenarios classified as

Category C7 (limit warming to 4°C (>50%)), represented by REMIND-MagPIE 2.1-4.2\_EN\_NPi2100. Solid lines and dotted lines represent median and representative scenarios.

## Energy demand and renewable energy resources

The data sources for energy demand and renewable energy technical potential follow the methodology of a previous study<sup>1</sup> and are publicly available in the Japan Energy Database<sup>15</sup>. However, deploying renewable energy up to its technical potential could provoke social resistance, thereby substantially undermining feasibility. Accordingly, this study assumes an upper limit of renewable energy deployment at 50% of the technical potential.

## Power plants

The location, capacity, and commissioning year of power plants were obtained from the Electrical Japan<sup>16</sup> with developer's permission. Although some fossil-fuel power plants have been retrofitted for biomass co-firing, this study assumes that each plant operates based on its primary fuel.

## Hydrogen sector

Regional hydrogen demand was estimated based on national-level values from the representative scenario, scaled using estimated regional fuel consumption<sup>1</sup> and fuel substitution ratios derived from the IEA Net Zero Emissions (NZE) scenario<sup>17</sup>, according to the previous study<sup>18</sup>. To reduce model dimensionality and reflect economies of scale, hydrogen production, storage, and fuel cell-based power generation were aggregated at the substation node within each prefecture exhibiting the highest hydrogen demand. As previous studies<sup>18,19</sup> have shown that hydrogen transport offers limited economic advantages where the electricity grid is well developed, it is not explicitly modeled. Hydrogen imports from overseas are allowed; however, the import price is assumed to be uniform across all regions.

## Carbon sector

To support CO<sub>2</sub> emissions reductions, the model allows for the retrofitting of existing fossil fuel and waste incineration power plants with carbon capture technologies. Moreover, in line with many scenarios aiming to achieve the 1.5°C target, negative emissions in the power sector are considered essential. Accordingly, two negative emissions technologies are included: bioenergy with carbon capture and storage (BECCS) and direct air capture and sequestration (DACCS). DACCS is assumed to be deployable at substation nodes located near five areas currently undergoing feasibility studies and pilot demonstrations<sup>20</sup>. For each site, the estimated storage potential is treated as the upper bound for CO<sub>2</sub> sequestration.

## Technology costs and specifications

For power generation technologies, this study adopts the median of technology assumptions for Japan used across 16 integrated assessment models<sup>21,22</sup>. Other sources for each technology are shown in Supplementary Table 1. Technology specifications, such as fixed operation and management cost, lifetime, and efficiency, provided in Supplementary Table 2.

Supplementary Table 1: Overnight cost

| Technology                        | Unit                | 2020  | 2030  | 2040  | 2050  | Source  |
|-----------------------------------|---------------------|-------|-------|-------|-------|---------|
| Solar PV                          | \$/kW               | 1,450 | 1,384 | 1,236 | 1,025 | [21,22] |
| Onshore wind                      | \$/kW               | 1,278 | 1,168 | 1,180 | 1,096 | [21,22] |
| Floating offshore wind            | \$/kW               | 3,027 | 2,767 | 2,588 | 2,366 | [21–23] |
| Fixed offshore wind               | \$/kW               | 2,066 | 1,889 | 1,726 | 1,577 | [21,22] |
| Geothermal                        | \$/kW               | 3,663 | 3,663 | 3,663 | 3,663 | [21,22] |
| Run-of-river                      | \$/kW               | 3,266 | 3,266 | 3,220 | 3,220 | [21,22] |
| Hydro reservoir                   | \$/kW               | 2,208 | 2,162 | 2,162 | 2,162 | [21,22] |
| Biomass                           | \$/kW               | 2,046 | 2,046 | 2,046 | 2,046 | [21,22] |
| Biomass w/ CCS                    | \$/kW               | 5,510 | 4,908 | 4,305 | 3,688 | [21,22] |
| Waste-to-power                    | \$/kW               | 1,572 | 1,572 | 1,572 | 1,572 | [24]    |
| Waste-to-power w/ CCS             | \$/kW               | 3,781 | 2,813 | 2,705 | 2,597 | [24,25] |
| Coal power                        | \$/kW               | 1980  | 1980  | 1980  | 1980  | [21,22] |
| Coal power w/ CCS                 | \$/kW               | 4113  | 3810  | 3496  | 3447  | [21,22] |
| Gas power                         | \$/kW               | 986   | 942   | 924   | 924   | [21,22] |
| Gas power w/ CCS                  | \$/kW               | 2046  | 1860  | 1773  | 1771  | [21,22] |
| Oil power                         | \$/kW               | 1253  | 1253  | 1253  | 1253  | [21,22] |
| Nuclear                           | \$/kW               | 5854  | 5854  | 5854  | 5854  | [26]    |
| Fuel cell                         | \$/kW               | 182   | 72    | 60    | 48    | [27]    |
| PEM electrolyzer                  | \$/kW <sub>H2</sub> | 1,058 | 1,127 | 774   | 421   | [28]    |
| Pumped hydro storage              | \$/kWh              | 622   | 622   | 622   | 622   | [23]    |
| LiB battery - Energy capacity     | \$/kWh              | 478   | 342   | 273   | 216   | [23]    |
| LiB battery - Power capacity      | \$/kW               | 444   | 444   | 410   | 376   | [23]    |
| H2 compressor                     | \$/kW               | 171   | 171   | 132   | 93    | [29,30] |
| Compressed H2 storage             | \$/kWh              | 50    | 50    | 38    | 25    | [29,30] |
| AC transmission line              | \$/kWkm             | 1.14  | 1.14  | 1.14  | 1.14  | [31]    |
| HVAC transmission line            | \$/kWkm             | 3.07  | 3.07  | 3.07  | 3.07  | [32]    |
| HVDC transmission line (Onshore)  | \$/kWkm             | 2.51  | 2.51  | 2.51  | 2.51  | [32]    |
| HVDC transmission line (Offshore) | \$/kWkm             | 3.76  | 3.76  | 3.76  | 3.76  | [32]    |
| Voltage source converter          | \$/kW               | 228   | 228   | 228   | 228   | [32]    |
| Direct air capture                | \$/kW <sub>el</sub> | 5,762 | 2,813 | 2,323 | 1,834 | [33]    |

Supplementary Table 2: Technology specification

| Technology                                     | FOM <sup>a</sup><br>[%/a] | Lifetime<br>[a] | Efficiency | Loss rate | Source     |
|------------------------------------------------|---------------------------|-----------------|------------|-----------|------------|
| Solar PV                                       | 1.5                       | 25              |            |           | [21,22]    |
| Onshore wind                                   | 2.0                       | 20              |            |           | [21,22]    |
| Floating offshore wind                         | 3.8                       | 25              |            |           | [21–23]    |
| Fixed offshore wind                            | 3.8                       | 25              |            |           | [21,22]    |
| Geothermal                                     | 4.0                       | 40              |            |           | [21,22]    |
| Run-of-river                                   | 2.0                       | 60              |            |           | [21,22]    |
| Hydro reservoir                                | 2.6                       | 100             |            |           | [21,22]    |
| Biomass                                        | 4.3                       | 30              | 0.37       |           | [21,22]    |
| Biomass w/ CCS                                 | 2.2                       | 30              | 0.36       |           | [21,22]    |
| Waste-to-power                                 | 4.3                       | 40              | 0.19       |           | [24]       |
| Waste-to-power w/ CCS                          | 3.8                       | 40              | 0.19       |           | [24,34]    |
| Coal power                                     | 2.7                       | 30              | 0.45       |           | [21,22]    |
| Coal power w/ CCS                              | 1.9                       | 30              | 0.40       |           | [21,22]    |
| Gas power                                      | 2.6                       | 30              | 0.56       |           | [21,22]    |
| Gas power w/ CCS                               | 1.8                       | 30              | 0.55       |           | [21,22]    |
| Oil power                                      | 3.0                       | 30              | 0.40       |           | [21,22]    |
| Nuclear                                        | 3.6                       | 60              | 0.35       |           | [26]       |
| Fuel cell                                      | 5.0                       | 10              | 0.50       |           | [25]       |
| PEM electrolyzer                               | 1.4                       | 25              | 0.80       |           | [28]       |
| Pumped hydro storage <sup>b</sup>              | 0.5                       | 100             | 0.80       |           | [23]       |
| LiB battery - Energy capacity <sup>b</sup>     | 2.5                       | 15              | 0.85       |           | [23]       |
| LiB battery - Power capacity                   | 2.5                       | 15              | 0.85       |           | [23]       |
| Compressed H2 storage <sup>b</sup>             | 4.5                       | 30              | 0.99       |           | [29]       |
| H2 compressor                                  | 8.5                       | 15              |            |           | [29]       |
| AC transmission line <sup>c</sup>              | 1.6                       | 40              |            | 0.07      | [32,35,36] |
| HVAC transmission line <sup>c</sup>            | 1.6                       | 40              |            | 0.07      | [35,36]    |
| HVDC transmission line (Onshore) <sup>c</sup>  | 1.6                       | 40              |            | 0.03      | [35,36]    |
| HVDC transmission line (Offshore) <sup>c</sup> | 1.6                       | 40              |            | 0.03      | [35,36]    |
| Voltage source converter <sup>d</sup>          | 2.8                       | 30              |            | 0.01      | [32,35]    |
| Direct air capture <sup>e</sup>                | 3.7                       | 30              |            |           | [33]       |

a. Fixed Operation and Maintenance (FOM) cost is expressed as a ratio to the overnight cost.

b. The efficiency of battery storage refers to the round-trip efficiency of charging–discharging cycle.

c. The loss rate of transmission refers to the energy loss per 1000 km of transmission distance.

d. The loss rate of VSC refers to the AC-DC conversion loss.

e. The energy efficiency of DAC is 13.2 kWh of electricity to remove 1.0 tCO<sub>2</sub>.

Data center growth assumptions

| Supplementary Table 3: Data center capacity (GW) |      |      |      |      |
|--------------------------------------------------|------|------|------|------|
| Scenario                                         | 2020 | 2030 | 2040 | 2050 |
| High                                             | 2.7  | 5.1  | 15.0 | 30.1 |
| Mid                                              | 2.7  | 5.1  | 9.3  | 15.3 |
| Low                                              | 2.7  | 5.1  | 5.7  | 6.1  |

\* TWh-based forecasts from Mase et al. (2024) are converted to GW-based values, assuming a capacity factor of 0.8 from the same literature.

## 2 Integrated location assessment

### 2.1 Assessment framework

The Integrated Location Assessment (ILA) framework estimates the siting potential of each region using the following equation:

$$P_r = R_r \times (A_r - E_r) \quad (\text{S4})$$

where  $P_r$  represents the maximum developable land area in region  $r$ . First, the total land area  $A_r$  is adjusted by subtracting the excluded area  $E_r$ , which accounts for site-specific constraints. Then, a regional suitability factor  $R_r$  is applied. This is a binary indicator (0 or 1) that reflects whether the remaining land can be utilized, based on region-specific conditions. In this study, to avoid land-use conflicts and ensure infrastructure access and social acceptance,  $A_r$  is defined as the available area within industrial zones. The polygon data of industrial zones is obtained from municipal zoning data provided by the Ministry of Land, Infrastructure, Transport and Tourism of Japan (MLIT)<sup>37</sup>. Since data on actual vacancy is not available, we assume a 4.8% average vacancy rate based on a random sample of 50 existing industrial parks from the literature<sup>38</sup>. The land-based potential is then converted into server load capacity using an empirical capacity density of 480 MW/km<sup>2</sup> based on a random sample of 20 existing data centers from publicly available data (mainly from the Data Center Map<sup>39</sup>). The sample data for these assumptions are provided at the GitHub repository: <https://github.com/hiroakionodera/DC-tools>.

Note that the potential of less than 100 MW is truncated to reflect economies of scale and to align with the electricity demand simulation, which assumes a 100 MW data center.

### 2.2 Criteria selection

45 decision-making criteria for data center siting have been systematically identified by Erdem et al.(2024), with quantified weights assigned to each criterion (Supplementary Figure 10). From these, we selected seven region-specific and site-specific criteria, as shown in Table 4. Criteria related to electricity supply were excluded, as they are endogenously represented within the energy system model. Additionally, the following regional criteria were excluded:

- Affected population by natural disasters: Excluded as direct disaster risks are considered through other criteria.
- Exposure to droughts: Interpreted as a regional climatic factor influencing cooling demand in the energy system model.
- Protected area: Excluded as industrial zones is implemented instead.
- Forest resources: Excluded due to their limited weight.
- Freshwater resources: Also excluded due to their limited weight.



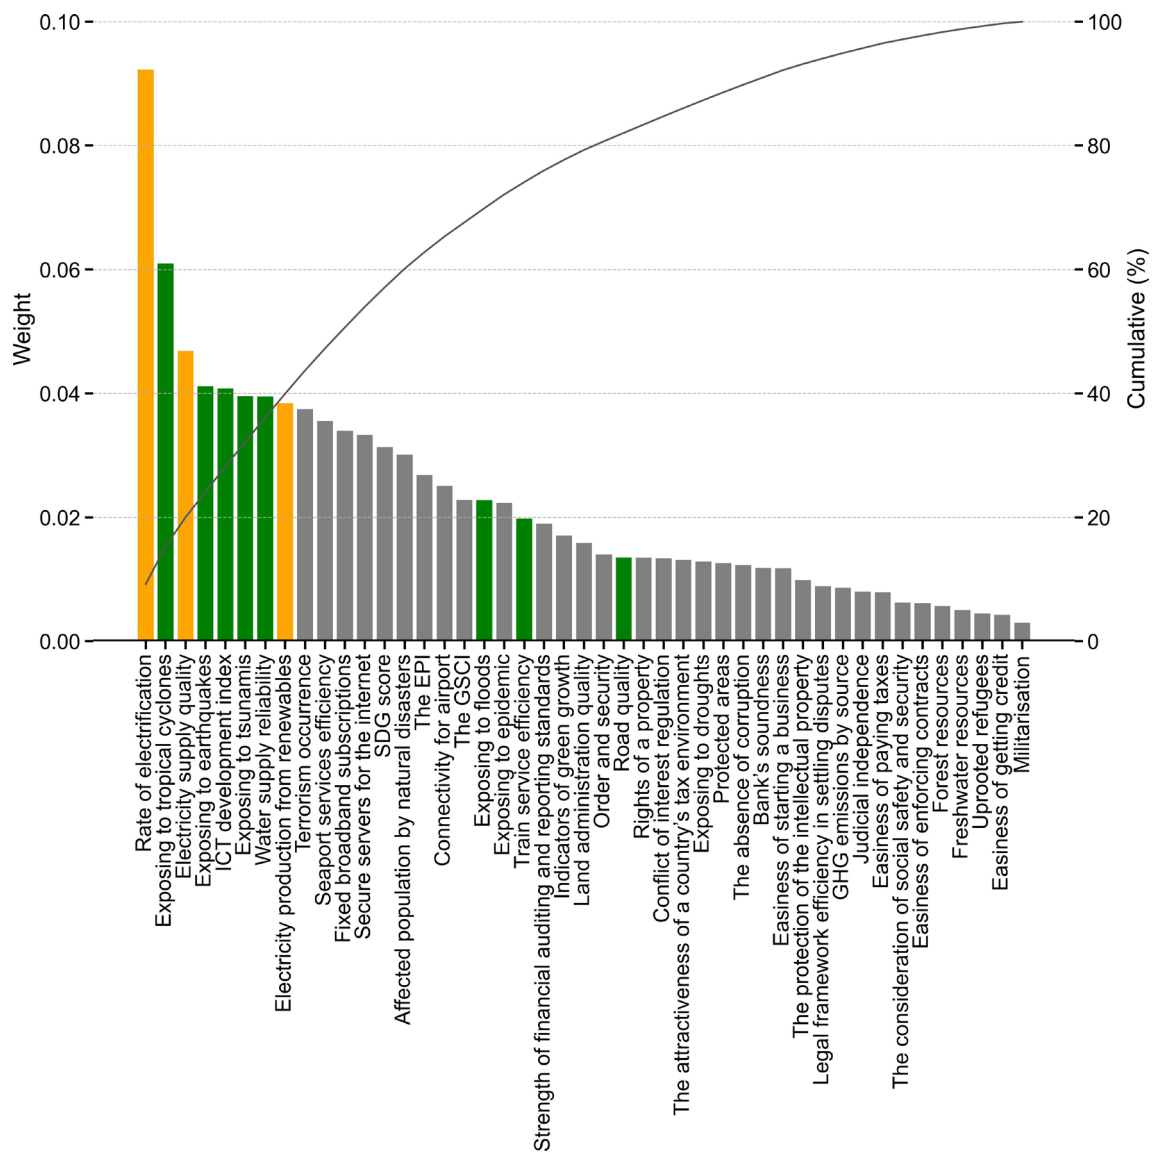

Supplementary Figure 10: Pareto chart of decision factors for data center siting. Green indicates the indicators adopted in this study, yellow represents factors related to the power sector, and grey corresponds to national indicators and regional indicators that were not adopted. Original data are obtained from Erdem and Özdemir (2024)<sup>40</sup>.

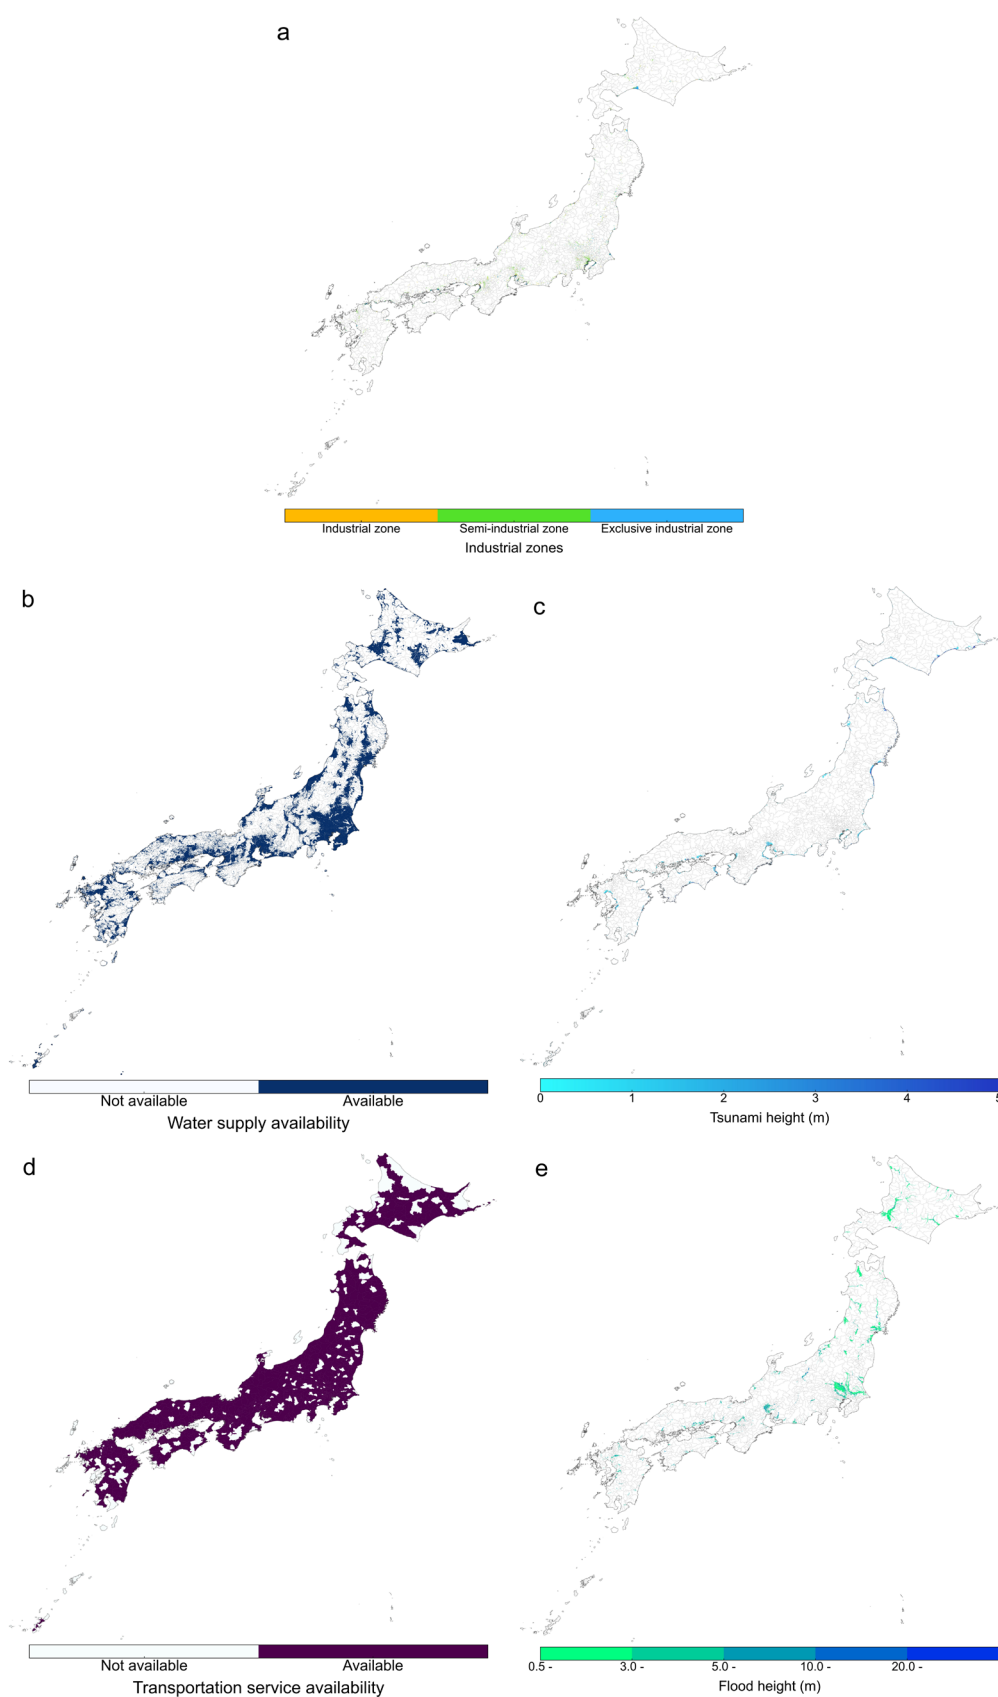

Supplementary Figure 11: Regional factors relevant to data center siting. **a** indicates

industrial zones; **b**, water supply areas; **c**, potential tsunami inundation height; **d**, availability of highway interchanges or railway stations; and **e**, potential flood inundation heigh. Data sources are summarized in the Supplementary Table 4.

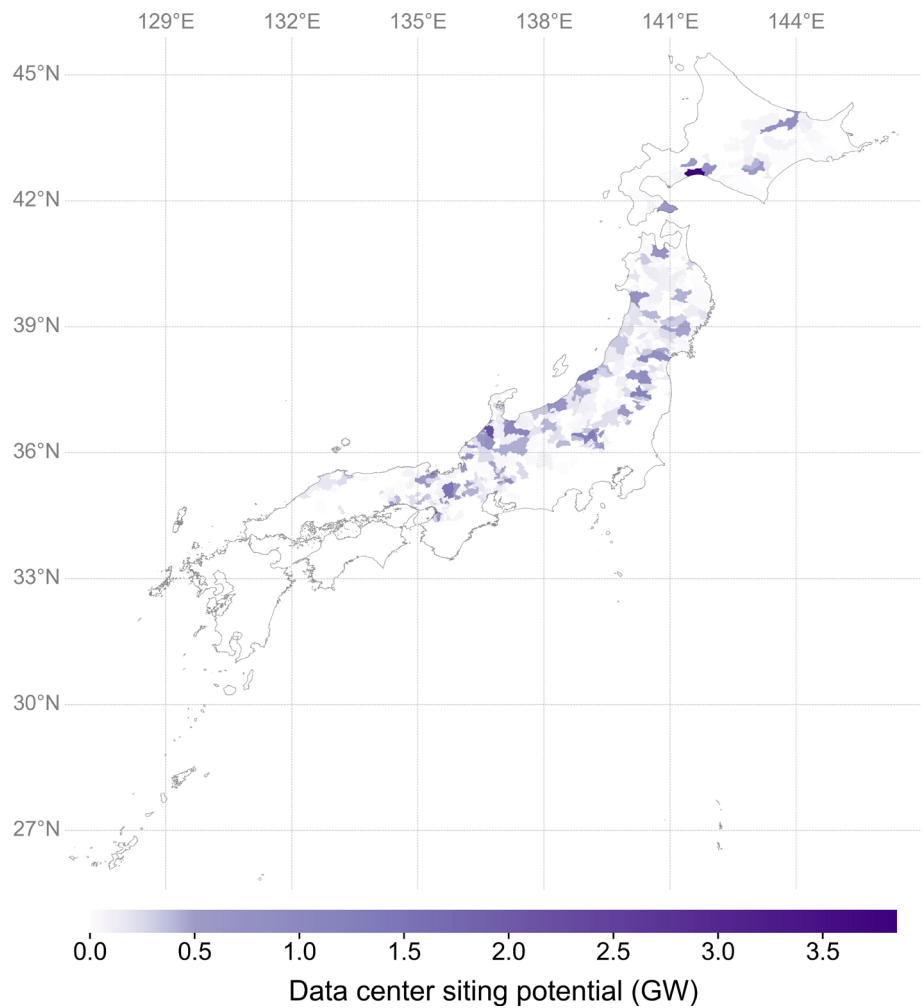

Supplementary Figure 12: Data center siting potential based on integrated locational assessment.

Supplementary Table 4: Location assessment criteria

| Criterion                     | Spatial scope   | Data                                                                                   |
|-------------------------------|-----------------|----------------------------------------------------------------------------------------|
| Exposing to earthquakes       | Site-specific   | Probabilistic seismic hazard maps <sup>41</sup>                                        |
| Exposing to tsunamis          | Site-specific   | Tsunami inundation estimation data <sup>37</sup>                                       |
| Exposing to floods            | Site-specific   | Flood inundation estimation data <sup>37</sup>                                         |
| Exposing to tropical cyclones | Region-specific | d4PDF tropical cyclone track dataset <sup>42</sup>                                     |
| ICT development index         | Region-specific | Speedtest by Ookla Global Fixed and Mobile Network Performance Map Tiles <sup>43</sup> |
| Train service efficiency      | Region-specific | Railway data <sup>37</sup>                                                             |
| Road quality                  | Region-specific | Expressway time series data <sup>37</sup>                                              |
| Water supply reliability      | Region-specific | Waterworks-related facility data <sup>37</sup>                                         |

## References

1. Onodera, H., Delage, R. & Nakata, T. The role of regional renewable energy integration in electricity decarbonization—A case study of Japan. *Appl Energy* 363, 123118 (2024).
2. OpenStreetMap Contributors. OpenStreetMap. <https://www.openstreetmap.org/>.
3. Organization for Cross-regional Coordination of Transmission Operators (OCCTO). Grid information service (in Japanese). <https://www.occto.or.jp/keitoujouhou/index.html>.
4. The Okinawa Electric Power Company. Grid Interconnection Constraints and Distribution Facility Plans (in Japanese). <https://www.okiden.co.jp/business-support/service/rule/plan/index.html>.
5. Kyushu Electric Power Transmission and Distribution. Disclosure of power grid information (in Japanese). <https://www.kyuden.co.jp/td/service/wheeling/disclosure.html>.
6. Shikoku Electric Power Transmission & Distribution Company. Disclosure of grid access information (in Japanese). [https://www.yonden.co.jp/nw/line\\_access/index.html](https://www.yonden.co.jp/nw/line_access/index.html).
7. Chugoku Electric Power Transmission & Distribution. Disclosure of grid access information (in Japanese). <https://www.energia.co.jp/nw/service/retailer/keitou/access/index.html>.
8. Kansai Transmission and Distribution. Distribution facility construction plans, grid interconnection constraints, etc. (in Japanese). <https://www.kansai-td.co.jp/consignment/disclosure/distribution-equipment/index.html>.
9. Hokuriku Electric Power Transmission & Distribution Company. Disclosure of projected power flow and other information (in Japanese). [https://www.rikuden.co.jp/nw\\_notification/U\\_154seiyaku.html](https://www.rikuden.co.jp/nw_notification/U_154seiyaku.html).
10. Chubu Electric Power Grid. Power grid availability and projected power flow mapping (in Japanese). [https://powergrid.chuden.co.jp/goannai/hatsuden\\_kouri/takuso\\_kyokyu/rule/map/](https://powergrid.chuden.co.jp/goannai/hatsuden_kouri/takuso_kyokyu/rule/map/).
11. TEPCO Power Grid. Information on the power grid (in Japanese). <https://www.tepco.co.jp/pg/consignment/system/>.
12. Tohoku Electric Power Network. Information on available capacity of the power grid, etc. (in Japanese). <https://nw.tohoku-epco.co.jp/consignment/system/announcement/index.html>.
13. Hokkaido Electric Power Network. Disclosure of power grid information (in Japanese). [https://www.hepco.co.jp/network/con\\_service/public\\_document/bid\\_info.html](https://www.hepco.co.jp/network/con_service/public_document/bid_info.html).
14. Edward, B. et al. AR6 Scenarios Database hosted by IIASA. <https://data.ece.iiasa.ac.at/ar6> doi:doi.org/10.5281/zenodo.5886911.
15. Energy sustainability laboratory of Tohoku University. Japan Energy Database (Version 2.10). <https://energy-sustainability.jp/>.
16. Kitamoto, A. Electrical Japan. <https://agora.ex.nii.ac.jp/earthquake/201103-eastjapan/energy/electrical-japan/>.
17. IEA. Net Zero by 2050 - A Roadmap for the Global Energy Sector. <https://www.iea.org/reports/net-zero-by-2050> (2021).
18. Onodera, H., Delage, R. & Nakata, T. Systematic effects of flexible power-to-X operation in a renewable energy system - A case study from Japan. *Energy Conversion and Management: X* 20, 100416 (2023).
19. Neumann, F., Zeyen, E., Victoria, M. & Brown, T. The potential role of a hydrogen network in Europe. *Joule* (2023) doi:10.1016/J.JOULE.2023.06.016.
20. Japan Organization for Metals and Energy Security (JOGMEC). Overview of Advanced CCS Support Project (in Japanese). [https://www.jogmec.go.jp/ccs/advancedsupport\\_002.html](https://www.jogmec.go.jp/ccs/advancedsupport_002.html).
21. Krey, V. et al. Looking under the hood: A comparison of techno-economic assumptions across national and global integrated assessment models. *Energy* 172, 1254–1267 (2019).

22. Grant, N., Hawkes, A., Napp, T. & Gambhir, A. Cost reductions in renewables can substantially erode the value of carbon capture and storage in mitigation pathways. *One Earth* 4, 1588–1601 (2021).
23. National Renewable Energy Laboratory. 2024 Electricity Annual Technology Baseline. <https://atb.nrel.gov/electricity/2024/index> (2024).
24. Kogita, H. & Masuda, T. Wide Area Disposal from the Viewpoint of Waste-based Power Generation. *Material Cycles and Waste Management Research* 21, 358–367 (2010).
25. Danish Energy Agency. Technology Data for Generation of Electricity and District Heating (Version 12). 2022 <https://ens.dk/en/analyses-and-statistics/technology-data-generation-electricity-and-district-heating>.
26. Ministry of Economy, Trade and Industry (METI). Summary of Power Generation Cost Validation (in Japanese). [https://www.enecho.meti.go.jp/committee/council/basic\\_policy\\_subcommittee/mitoshi/cost\\_wg/pdf/cost\\_wg\\_20250206\\_01.pdf](https://www.enecho.meti.go.jp/committee/council/basic_policy_subcommittee/mitoshi/cost_wg/pdf/cost_wg_20250206_01.pdf) (2025).
27. James, B. D., Huya-Kouadio, J. M., Houchins, C. & DeSantis, D. A. Mass Production Cost Estimation of Direct H2 PEM Fuel Cell Systems for Transportation Applications: 2018 Update. <https://www.energy.gov/sites/prod/files/2019/12/f70/fcto-sa-2018-transportation-fuel-cell-cost-analysis.pdf> (2018).
28. Böhm, H., Zauner, A., Rosenfeld, D. C. & Tichler, R. Projecting cost development for future large-scale power-to-gas implementations by scaling effects. *Appl Energy* 264, 114780 (2020).
29. Argonne National Laboratory. Hydrogen Delivery Scenario Analysis Model (HDSAM) V3.1. <https://hdsam.es.anl.gov/> (2022).
30. Cassidy Houchins & Brian D. James. Hydrogen Storage Cost Analysis. [https://www.hydrogen.energy.gov/docs/hydrogenprogramlibraries/pdfs/review22/st235\\_houchins\\_2022\\_p-pdf.pdf](https://www.hydrogen.energy.gov/docs/hydrogenprogramlibraries/pdfs/review22/st235_houchins_2022_p-pdf.pdf) (2022).
31. OCCTO. Disclosure of Standard Unit Prices for Transmission and Substation Equipment (in Japanese). [https://www.occto.or.jp/access/oshirase/2015/files/20160329\\_tanka\\_kouhyou.pdf](https://www.occto.or.jp/access/oshirase/2015/files/20160329_tanka_kouhyou.pdf) (2016).
32. NationalGridESO. Electricity Ten Year Statement 2015 - Appendix E. <https://www.nationalgrideso.com/research-publications/etys/archive> (2015).
33. Fasihi, M., Efimova, O. & Breyer, C. Techno-economic assessment of CO<sub>2</sub> direct air capture plants. *J Clean Prod* 224, 957–980 (2019).
34. METI. Final Summary of CCS Long-term Roadmap Committee (in Japanese). [https://www.meti.go.jp/shingikai/energy\\_environment/ccs\\_choki\\_roadmap/pdf/20230310\\_1.pdf](https://www.meti.go.jp/shingikai/energy_environment/ccs_choki_roadmap/pdf/20230310_1.pdf) (2023).
35. OCCTO. Cost-benefit evaluation of inter-regional interconnection lines (in Japanese). (2018).
36. IEA-ETSAP. Electricity Transmission and Distribution. [https://iea-etsap.org/E-TechDS/PDF/E12\\_el-t&d\\_KV\\_Apr2014\\_GSOK.pdf](https://iea-etsap.org/E-TechDS/PDF/E12_el-t&d_KV_Apr2014_GSOK.pdf) (2014).
37. MLIT. National land information (in Japanese). <https://nlftp.mlit.go.jp/ksj/index.html>.
38. Japan Industrial Location Center. Industrial Site Guide in FY2023 (in Japanese). <https://www.jilc.or.jp/files/libs/2938/202311141144078185.pdf> (2023).
39. Data Center Map. Japan Data Centers. <https://www.datacentermap.com/japan/>.
40. Erdem, M. & Özdemir, A. Sustainability and risk assessment of data center locations under a fuzzy environment. *J Clean Prod* 450, (2024).
41. National Research Institute for Earth Science and Disaster Resilience (NIED). Probabilistic Seismic Hazard Maps. <https://www.j-shis.bosai.go.jp/en/downloads>.
42. Webb, A. d4PDF tropical cyclone track dataset. <https://doi.org/10.20783/DIAS.640> (2022).
43. Ookla. Speedtest by Ookla Global Fixed and Mobile Network Performance Map Tiles. <https://github.com/teamookla/ookla-open-data>.
